# Supplementary material for: GJA1 Expression and Its Prognostic Value in Cervical Cancer
Source: Biomed Res Int. 2020 Nov 24;2020:8827920. doi: 10.1155/2020/8827920 (PMC7709497; doi:10.1155/2020/8827920)
Supplement: Supplementary 2 — Supplementary Table 1: information of selected six GEO datasets and GJA1 expression in these datasets. Supplementary Table 2: gene sets enriched in the high-GJA1-expression phenotype. [file 8827920.f2.zip]

Archive with 2 entries (2 files):
- Supplementary Table 1.docx
- Supplementary Table 2.docx
